# Análisis numérico 3D de las características del flujo en un canal curvo

## 3D numerical analysis of flow characteristics in an open – channel bend

Sánchez-Cordero, E. <sup>a,b</sup>, Gómez, M. <sup>b1</sup>, Bladé, E. <sup>b2</sup>

<sup>a</sup> Departamento de Ingeniería Civil, Facultad de Ingeniería, Universidad de Cuenca, Av. 12 de Abril s/n., 10150, Cuenca, Ecuador.  
E-mail: <sup>a</sup>esteban.sanchezc@ucuenca.edu.ec.

<sup>b</sup> Institut Flumen. Universitat Politècnica de Catalunya. C/ Jordi Girona 1-3, 08034, Barcelona, España.  
E-mail: <sup>b1</sup>manuel.gomez@upc.edu, <sup>b2</sup>ernest.blade@upc.edu

Recibido: 28/08/2019

Aceptado: 10/07/2020

Publicado: 31/07/2020

**Citar como:** Sánchez-Cordero, E., Gómez, M., Bladé, E. 2020. 3D numerical analysis of flow characteristics in an open – channel bend. *Ingeniería del agua*, 24(3), 157-168. <https://doi.org/10.4995/ia.2020.12276>

---

## RESUMEN

El presente trabajo muestra un análisis numérico 3D del comportamiento del flujo de agua en un canal curvo influenciado por la presencia de un vertedero y una compuerta. La simulación numérica se realizó utilizando el software de Dinámica de Fluidos Computacional (CFD) basado en el método de volúmenes finitos (FVM) – OpenFOAM. En el modelo numérico la turbulencia se trata con la metodología RANS ( $k-\epsilon$ ,  $k-\omega$ , y RNG  $k-\epsilon$ ) y se usa el método VOF (*Volume of Fluid*) para la captura de la superficie libre del agua. Los resultados numéricos obtenidos se evalúan al compararlos con los valores experimentales de calado en diferentes puntos dentro del dominio. Los valores de calado se midieron haciendo uso de sensores de nivel de agua y limnímetros. De esta manera, los resultados numéricos tridimensionales obtenidos son utilizados para analizar las líneas de corriente, las componentes de velocidades y los flujos secundarios.

**Palabras clave** | análisis tridimensional; canal curvo; RANS; VOF; OpenFOAM.

---

## ABSTRACT

*In this paper, three-dimensional numerical analysis of flow field patterns in an open channel bend influenced by a weir and a sluice gate is presented. The simulation was performed using the open source computational fluid dynamics (CFD) solver based on finite volume method (FVM) – OpenFOAM. Turbulence is treated using Reynolds-Averaged Navier Stokes equations (RANS) approach (i.e.,  $k-\epsilon$ ,  $k-\omega$ , y  $k-\epsilon$ (RNG)), and the volume of fluid (VOF) method is used to simulate the air-water interface. The numerical results are assessed against experimental data (water depth) at different points within the domain. Water depths were measured by means of water level sensors and limnimeters. Therefore, the three-dimensional numerical results obtained are used to analyze streamlines, components of velocities, and secondary flows.*

**Key words** | three-dimensional; open-channel bend; RANS; VOF; OpenFOAM.

## INTRODUCCIÓN

El flujo en la curva de un canal se caracteriza por la presencia de un movimiento circulatorio generado en planos perpendiculares a la dirección principal del movimiento llamado flujo secundario. Los flujos secundarios se forman debido al desequilibrio en el gradiente de presión transversal y la fuerza centrífuga (Rozovskiĭ, 1957). La interacción entre el flujo principal y el flujo secundario forma un movimiento en espiral, denominado flujo helicoidal. Este flujo produce importantes cambios en la distribución de las componentes de velocidad, líneas de corriente, y puede producir separación del flujo de los contornos aguas abajo (Naji Abhari et al., 2010). Lo expuesto lleva a colegir que, una descripción detallada de las características del patrón de flujo en la curva de un canal no sea una tarea sencilla pues, la toma de datos de velocidad en el mismo puede ser una tarea complicada ya que, al introducir los aparatos de medida en el seno del fluido perturba el campo real de velocidades y no se puede determinar un registro de datos con propiedad.

Estudios realizados por Gholami et al. (2014) y Naji Abhari et al. (2010) involucraron la comparación entre los resultados experimentales y los resultados obtenidos con la aplicación de modelos numéricos tridimensionales. Los resultados mostraron un ajuste conveniente en las variables hidráulicas de calado y velocidad. Así, la alternativa puede ser el empleo de modelos avanzados de flujo 3D para una representación adecuada del campo de velocidades. Los avances en los últimos años en lo referente al poder computacional, tanto en velocidad de cálculo como en almacenamiento de datos, han permitido el uso de modelos numéricos tridimensionales, los cuales están basados en resolver mediante métodos numéricos asistidos por computador las ecuaciones de Navier Stokes.

Los primeros estudios de flujos secundarios en canales curvos fueron presentados por (Ippen y Drinker, 1962; Rozovskiĭ, 1957). Simulaciones numéricas basadas en ecuaciones 2D fueron realizadas por Kalkwijk y de Vriend (1980). Diversos estudios se han llevado a cabo por diferentes investigadores (Gholami et al., 2014; Naji Abhari et al., 2010; Ramamurthy et al., 2013) para evaluar las características del flujo en las curvas de canales mediante el uso de modelos numéricos tridimensionales. Naji Abhari et al. (2010), estudiaron experimental y numéricamente las características del flujo en un canal curvo. Los resultados mostraron que el patrón de flujo está ampliamente influenciado por el flujo secundario y la fuerza centrífuga. Ramamurthy et al. (2013) estudiaron el patrón de flujo en un canal que posee una curva pronunciada haciendo uso de dos códigos numéricos, PHOENICS y FLUENT. Los resultados numéricos fueron comparados con datos experimentales. Estos autores identificaron que una adecuada representación del flujo secundario en la curva del canal requiere de un apropiado tratamiento de la superficie libre y del uso apropiado de un modelo de turbulencia. Gholami et al. (2014) presentaron un estudio experimental y numérico de los patrones de flujo en un canal curvo. En ese estudio se analizaron las características del flujo secundario, componentes de velocidad y esfuerzo cortante.

El presente estudio muestra un análisis de las características del flujo en un canal curvo influenciado por un vertedero y una compuerta haciendo uso del código abierto y de libre acceso - OpenFOAM. En el modelo numérico la turbulencia es tratada con la metodología RANS y el método VOF es usado para la captura de la superficie libre del agua. Los resultados numéricos obtenidos son evaluados al compararlos con las medidas experimentales de calado presentados por Gómez y Martínez-Gomariz (2016). Además, se realiza un análisis de sensibilidad del tamaño de malla. De esta manera, la configuración del modelo numérico 3D se utiliza para analizar el patrón de flujo a lo largo de la curva mediante el estudio de las variaciones de las líneas de corriente, componentes de velocidad y los flujos secundarios.

## DESCRIPCIÓN DEL MODELO EXPERIMENTAL

El experimento se llevó a cabo en el laboratorio de Hidráulica de la Universitat Politècnica de Catalunya. El canal PAC-UPC “Canal de Pruebas de Algoritmos de Control - Universitat Politècnica de Catalunya” tiene una forma serpenteante de 200 m de longitud con una sección transversal longitudinal de 0.44 m de ancho por 1 m de profundidad; además, el canal posee una pendiente horizontal nula. El fondo y las paredes laterales del canal son de concreto, mientras que las compuertas verticales y los vertederos rectangulares son de metacrilato y PVC, respectivamente. La curva donde se ubican el vertedero W1 y la compuerta G3 se eligió para este estudio debido a la fiabilidad que presenta la obtención del valor de caudal en esta zona (Figura 1). Las mediciones de

caudal se realizaron mediante el uso de un vertedero calibrado de pared delgada en forma de V; asimismo se efectuaron 10 medidas de calado en distintas posiciones dentro del canal. Para ello, dos sensores de nivel con una precisión de 0.1 mm fueron instalados en las posiciones 3 y 10; para el resto de calados se emplearon limnímetros con 1 mm de precisión.

Los datos experimentales presentados por Gómez y Martínez-Gomariz (2014) fueron obtenidos en condiciones de flujo estacionario. En la Tabla 1 se presentan los valores de caudal (Q), apertura de la compuerta (a) y la altura del vertedero (w) (refiérase a la Figura 1). El régimen de flujo del experimento fue subcrítico (Numero Froude  $\approx 0.1$ ) y turbulento completamente desarrollado (Número de Reynolds  $\approx 1.95 \times 10^5$ ).

**Tabla 1** | Características hidráulicas y geométricas en el experimento.

| Descarga Q (m <sup>3</sup> /s) | W (m) | a (m) | calado (m) |       |       |       |       |       |       |       |       |       |
|--------------------------------|-------|-------|------------|-------|-------|-------|-------|-------|-------|-------|-------|-------|
|                                |       |       | 1          | 2     | 3     | 4     | 5     | 6     | 7     | 8     | 9     | 10    |
| 0.094                          | 0.643 | 0.170 | 0.740      | 0.737 | 0.727 | 0.729 | 0.735 | 0.740 | 0.742 | 0.730 | 0.735 | 0.600 |

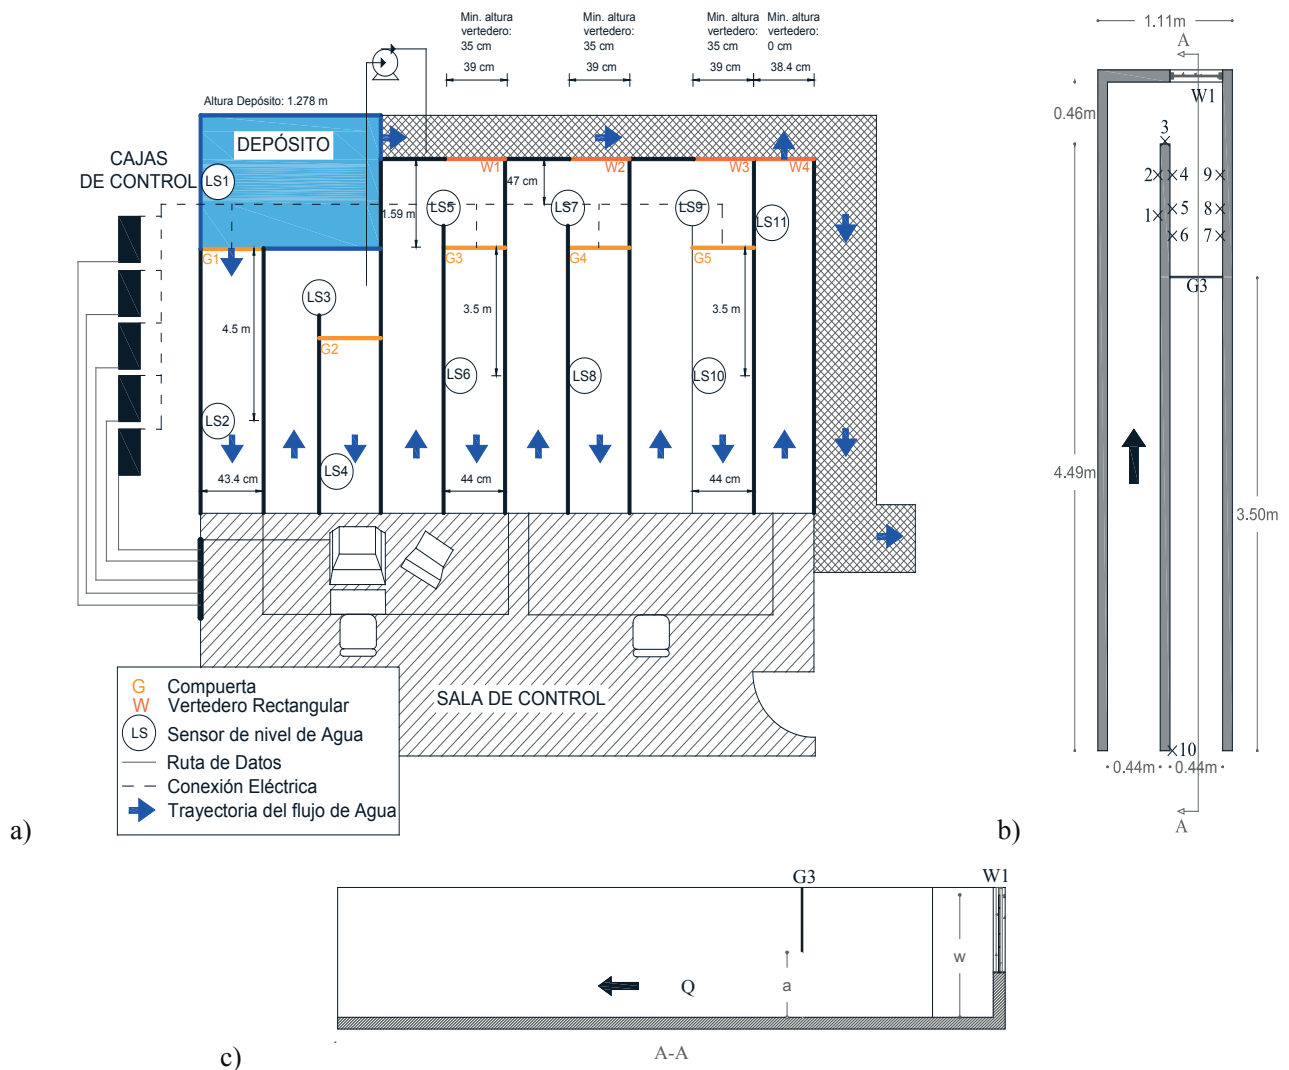

**Figura 1** | a) Esquema de las instalaciones del laboratorio UPC "Adaptado de Gómez y Martínez-Gomariz (2016)" b) Puntos de medición de calado, c) Detalle de la sección A-A.

## DESCRIPCIÓN DEL MODELO NUMÉRICO

En el presente trabajo se utiliza la plataforma de código abierto y libre acceso para la simulación de dinámica de fluidos computacional (CFD) basado en el método de volúmenes finitos (FVM) - OpenFOAM. El FVM es una técnica de discretización numérica que permite transformar ecuaciones diferenciales parciales en ecuaciones algebraicas. El dominio se divide en un conjunto finito no superpuesto de volúmenes o elementos (volúmenes de control) y se evalúan las ecuaciones de conservación en forma integral en cada elemento.

### Ecuaciones de gobierno

#### Modelo de Flujo

En este estudio se emplea el promedio de Reynolds de las ecuaciones de Navier-Stokes (RANS) para caracterizar el movimiento del agua. Las ecuaciones RANS están basadas en la descomposición de las variables de flujo en un valor medio y otro fluctuante. La ecuación de conservación de masa y la ecuación de conservación de cantidad de movimiento son presentadas a continuación:

$$\nabla \cdot \mathbf{u} = 0 \quad (1)$$

$$\frac{\partial \rho \mathbf{u}}{\partial t} + \nabla \cdot (\rho \mathbf{u} \mathbf{u}) - \nabla \cdot ((\mu + \mu_t) \mathbf{S}) = -\nabla p + \rho g + \sigma K \frac{\nabla \alpha}{|\nabla \alpha|} \quad (2)$$

En estas ecuaciones,  $\rho$  es la densidad,  $t$  es el tiempo,  $\mathbf{u}$  es el vector de velocidad,  $p$  es la presión,  $\mu_t$  es el coeficiente de viscosidad turbulenta (*eddy viscosity*),  $\mu$  es la viscosidad,  $\mathbf{S}$  es el tensor de deformaciones, ( $\mathbf{S} = 1/2(\nabla \mathbf{u} + \nabla \mathbf{u}^t)$ ) es la tensión superficial,  $\sigma$  es la curvatura superficial, y  $\alpha$  es la fracción de volumen de fase líquida en cada volumen de control (valor entre 0-1).

#### Modelo de la superficie libre

La superficie libre del agua se simula con el modelo denominado Volumen del fluido, VOF por sus siglas en inglés (*Volume of Fluid*), introducido por MacDonald (1971) y MacCormack y Paullay (1972). Para calcular la fracción de volumen de fase se utiliza una ecuación de transporte por convección

$$\frac{\partial \alpha}{\partial t} + \nabla(\alpha \cdot \mathbf{u}) + \nabla \cdot (\alpha(1 - \alpha)\mathbf{u}_r) = 0 \quad (3)$$

OpenFOAM implanta el tercer término de la expresión (3) denominado compresión de fase; en donde,  $\mathbf{u}_r = \mathbf{u}_l - \mathbf{u}_g$ . La densidad  $\rho$  y viscosidad  $\mu$  son definidas como:

$$\rho = \alpha \rho_l + (1 - \alpha) \rho_g \quad (4)$$

$$\mu = \alpha \mu_l + (1 - \alpha) \mu_g \quad (5)$$

en donde el subíndice  $l$  indica la parte de agua y  $g$  la parte de aire.

La suma total de las fracciones en un elemento de malla determinado para todo tiempo debe ser igual a uno. Así, cada celda computacional se encuentra con valores  $\alpha$  de entre 0 y 1. Si  $\alpha=0$  involucra que la celda está llena de aire, mientras que si el valor de  $\alpha=1$  la celda está llena de agua. Por el contrario, si el valor de  $\alpha$  en una celda se encuentra entre 0 y 1, dicha celda contiene la interfaz entre las dos fases.

## Modelos de Turbulencia

En este trabajo se analiza el desempeño de tres modelos de turbulencia RANS de dos ecuaciones;  $k-\varepsilon$ ,  $k-\omega$  y RNG  $k-\varepsilon$ . Estos modelos requieren la solución de dos ecuaciones de transporte, tanto para la energía cinética turbulenta como para la longitud de escala turbulenta. La formulación del modelo  $k-\varepsilon$  introducido por primera vez por Launder y Spalding (1974) se presenta en las ecuaciones (6) y (7)

$$\rho \frac{\partial k}{\partial t} + \rho(\mathbf{u} \cdot \nabla)k = \nabla \cdot \left[ \left( \mu + \frac{\mu_t}{\sigma_k} \right) \nabla k \right] + G - \rho \varepsilon \quad (6)$$

$$\rho \frac{\partial \varepsilon}{\partial t} + \rho(\mathbf{u} \cdot \nabla)\varepsilon = \nabla \cdot \left[ \left( \mu + \frac{\mu_t}{\sigma_\varepsilon} \right) \nabla \varepsilon \right] + c_1 \frac{\varepsilon}{k} G - c_2 \rho \frac{\varepsilon^2}{k} \quad (7)$$

donde  $k$  es la energía turbulenta,  $\varepsilon$  es la tasa de disipación, y  $G$  es la generación de energía cinética turbulenta. Los valores  $c_1$ ,  $c_2$ ,  $\sigma_k$  y  $\sigma_\varepsilon$  son valores constantes del modelo.

En el modelo  $k-\omega$  (Wilcox, 1994) se implementa una ecuación de transporte para la tasa de disipación turbulenta,  $\omega = \varepsilon / C_\mu k$ .

La formulación del modelo RNG  $k-\varepsilon$  (Yakhot y Orszag, 1986) difiere del modelo  $k-\varepsilon$  en la ecuación (7); en donde, un término extra  $R$  aparece en el lado derecho de dicha ecuación.

$$R = \frac{\eta(1 - \eta/\eta_0)}{1 + \beta\eta^3} \quad (8)$$

con,  $\eta = Sk/\varepsilon$ ,  $S = \sqrt{2\bar{S}_{ij}\bar{S}_{ij}}$ ; donde representa el esfuerzo tensor.

## Condiciones de contorno y condiciones iniciales

Las condiciones de contorno en el dominio computacional están conformadas por una entrada, dos tipos de salida del flujo de agua, la atmósfera, las paredes y el fondo (Figura 2).

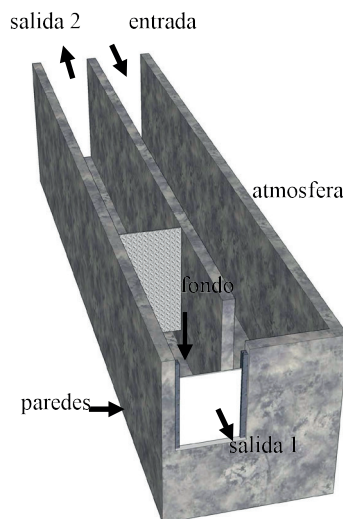

**Figura 2** | Esquema del canal – condiciones de contorno.

En la entrada se impone una condición de flujo subcrítico. En lo que respecta a la salida de flujo de agua, en la primera condición, denominada Salida 1, se asigna un valor de gradiente cero,  $\partial/\partial n=0$ , para todas las variables involucradas en el proceso de simulación. Por otro lado, en la segunda condición de salida, denominada Salida 2, se aplica una condición de flujo subcrítico, conocido el calado.

En la parte superior del experimento se impone una condición de contorno atmosférica, mientras que los lados que rodean al experimento y el fondo se definen con la condición de pared rugosa.

Finalmente, al comienzo de la simulación se establece una altura inicial de agua,  $H_0=60$  cm, dentro del dominio del experimento.

### Configuración del mallado

En el presente estudio, el dominio se discretiza utilizando elementos cartesianos hexaédricos no-uniformes con una densificación hacia las paredes y el fondo del experimento debido a los altos gradientes de las variables del flujo esperados. En estas zonas, se impone un valor mínimo de malla de 2.5 mm, mientras que se establecen líneas paralelas a los ejes como valores de tamaño de malla máximo: 40, 20 y 10 mm, tal y como se indica en la Figura 3.

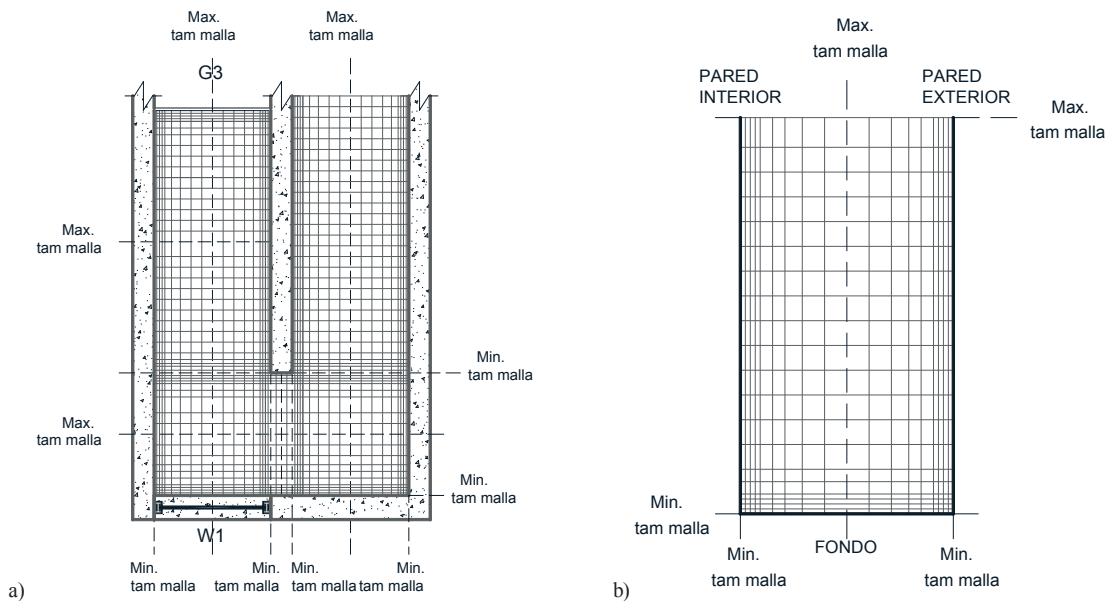

**Figura 3** | Configuración del mallado, a) vista en planta – detalle de la parte curva b) perfil de sección transversal.

Para garantizar la autonomía de los resultados en lo que refiere a la configuración de malla, se comparan los valores numéricos obtenidos de las simulaciones utilizando tres resoluciones de malla. A partir del elemento de menor dimensión, el factor de refinamiento de la cuadrícula entre tamaños consecutivos ( $r=h_{\text{grueso}}/h_{\text{fino}}$ ) se incrementa en 2; valor superior al propuesto por Celik et al. (2008). Adicionalmente, el modelo numérico se considera estable cuando la diferencia entre el valor de caudal de entrada y los dos de salida es menor a 0.1%.

Los resultados de las configuraciones numéricas utilizando los tres modelos de turbulencia,  $k-\varepsilon$ ,  $k-\omega$  y RNG  $k-\varepsilon$ , se analizan al compararlos con los valores experimentales de la variable calado en los puntos 3 y 10 (Figura 1) haciendo uso del parámetro estadístico denominado Error Relativo. Estas ubicaciones se eligieron para el análisis debido a que los sensores de nivel de agua (LS5 y LS6) están colocados en estos puntos. Basándose en la representación gráfica, la Figura 4 muestra una tendencia decreciente en los valores de Error relativo de los modelos numéricos en relación con la disminución en el espaciado de los tamaños de malla de valores máximos. El análisis muestra que el mejor ajuste ocurre con el modelo de turbulencia RNG  $k-\varepsilon$ .

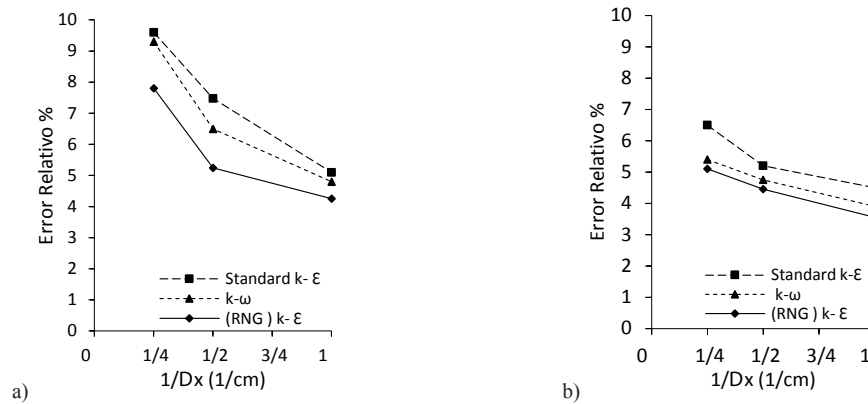

Figura 4 | Análisis de sensibilidad de malla: estimación del error relativo - calado, a) punto 3 y b) punto 10.

Una vez que se elige el modelo de turbulencia y el tamaño máximo de malla, se calibra la altura de rugosidad efectiva ( $k_s$ ) para la superficie del concreto. Se analizan tres valores de  $k_s$ ; 0.002, 0.003 y 0.004. Los resultados numéricos muestran un mejor ajuste cuando  $k_s=0.003$  cuando se comparan con los valores experimentales haciendo uso del Error relativo, según la Figura 5.

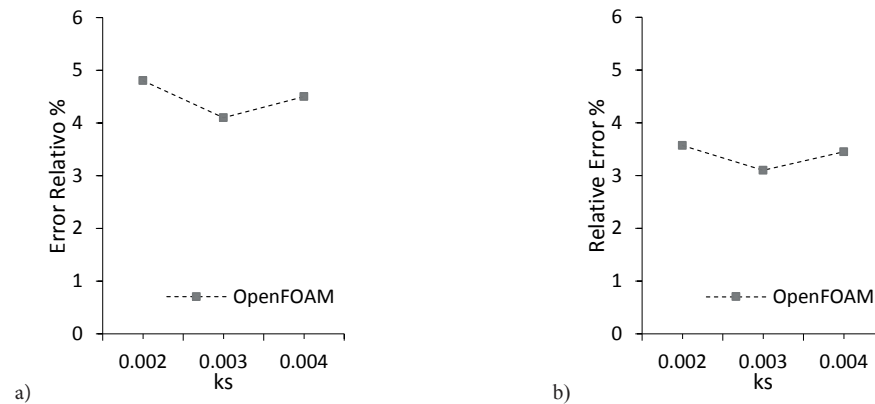

Figura 5 | Análisis de altura de rugosidad efectiva, a) punto 3 y b) punto 10.

Con el objetivo de evaluar la precisión de la configuración numérica, el criterio de error relativo se utiliza nuevamente para comparar los resultados de calado con los datos experimentales en las 10 ubicaciones dentro del dominio de estudio (Figura 6). La distribución de las ubicaciones de los puntos en análisis se presenta en la Figura 1 y sus valores se encuentran en la Tabla 1.

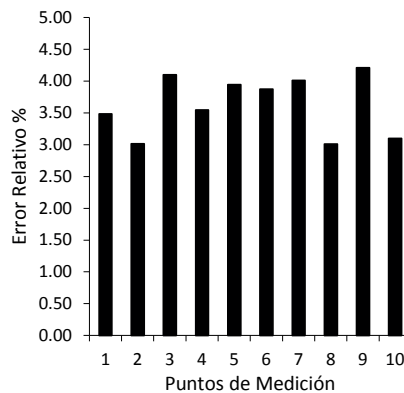

Figura 6 | Comparación de los valores de calado en los diferentes puntos de medición.

## RESULTADOS Y DISCUSIÓN

Con el objetivo de obtener una descripción adecuada del patrón de flujo en esta configuración de canal, se le divide en dos partes denominadas: *Primera curva cerrada* y *Segunda curva cerrada* (refiérase a la Figura 7). Se establecen secciones transversales verticales en las dos denominaciones del canal. En la *Primera curva cerrada*:  $0^\circ$ ,  $45^\circ$  y  $90^\circ$ ; mientras que, en la *Segunda curva cerrada*:  $0^\circ$ ,  $45^\circ$  y  $90^\circ$ .

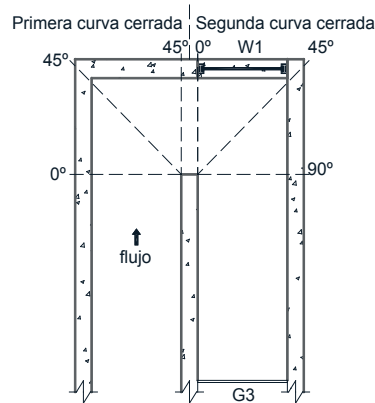

Figura 7 | Esquema y descripción de las secciones en el canal.

### Líneas de corriente

En las partes curvas de un canal abierto, el patrón de flujo presenta una importante característica denominada flujo secundario. En estas partes, el calado es ligeramente mayor cerca de la pared exterior que en las proximidades de la pared interior debido a la fuerza centrífuga.

En la Figura 8-a, las líneas de corriente en la sección ubicada al comienzo de la *Primera curva cerrada* exponen un flujo radial unidireccional hacia la pared interior del canal. En la Figura 8-b y la Figura 8-c, que corresponden a las secciones  $45^\circ$  y  $90^\circ$  respectivamente, se muestra la presencia del flujo secundario que se mueve a lo largo del lecho del canal. La rotación del flujo secundario mayor se encuentra cerca de la mitad del ancho del canal y dentro de los 40 cm de altura.

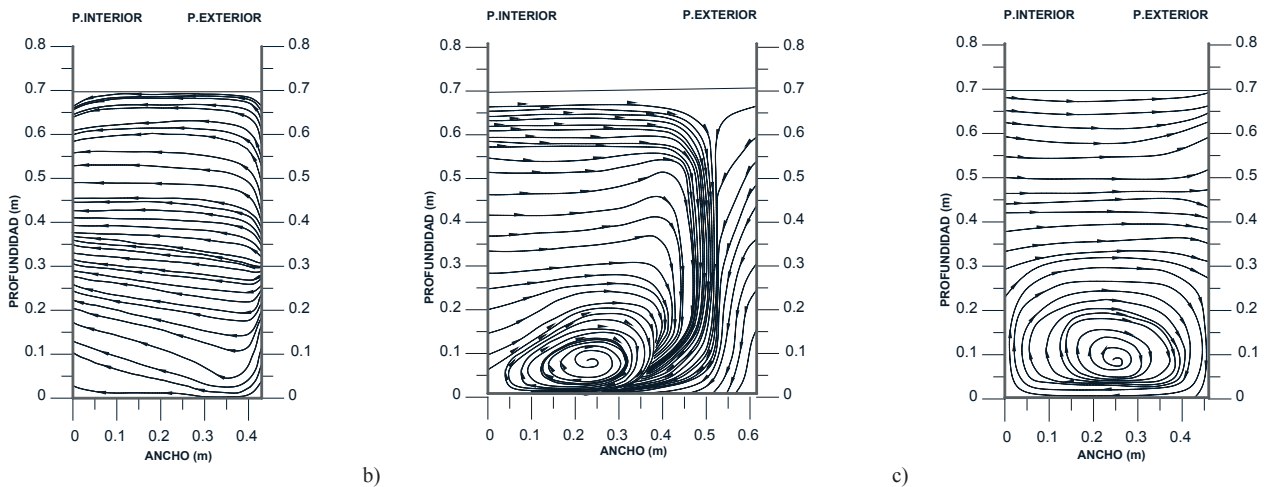

Figura 8 | Líneas de corriente – *Primera curva cerrada*, secciones: a)  $0^\circ$ , b)  $45^\circ$  y c)  $90^\circ$ .



La Figura 9 muestra las líneas de corriente en las diferentes secciones establecidas a lo largo de la *Segunda curva cerrada* que está influenciada por un vertedero y una compuerta. Se puede observar la formación de un flujo secundario menor cerca de la pared interna y dentro de los 20-50 cm de altura del canal; un flujo secundario mayor está presente en las cercanías de la mitad del ancho del canal y dentro de los 45 cm de altura en las dos primeras secciones bajo análisis (Figura 9-a y Figura 9-b), en tanto que, en la sección final el flujo secundario mayor está cerca de la pared exterior (Figura 9-c). La rotación del flujo secundario menor se produce en dirección opuesta a la del flujo secundario mayor.

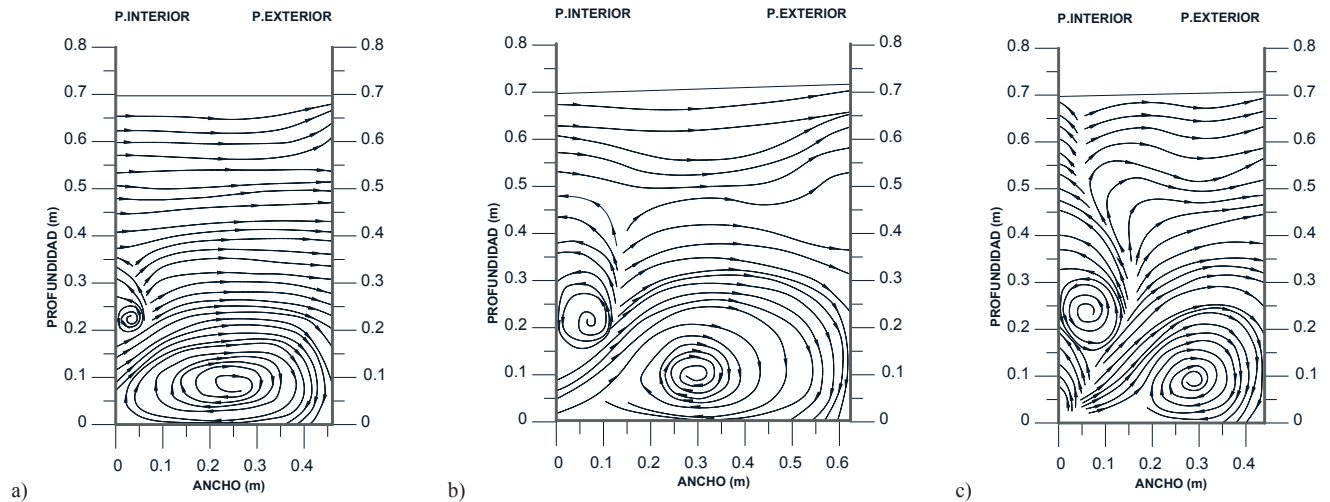

Figura 9 | Líneas de corriente – *Segunda curva cerrada*, secciones: a) 0°, b) 45° y c) 90°.

### Distribución de la componente de velocidad longitudinal

La Figura 10 presenta la distribución de la componente de velocidad longitudinal en las secciones transversales: 0°, 45° y 90°. En la *Primera curva cerrada*, la zona de mayor velocidad tiende a la pared interior del canal (Figuras 10 a-c). En la Figura 10-b, se observa una zona de velocidades bajas ( $\approx 0$  m/s) cerca de la pared exterior. Una integración de las líneas de contorno muestra que aproximadamente el 15% del área en esta sección transversal permanece casi estática. Al final de la *Primera curva cerrada*, la distribución de la velocidad es casi simétrica (Figura 10-c).

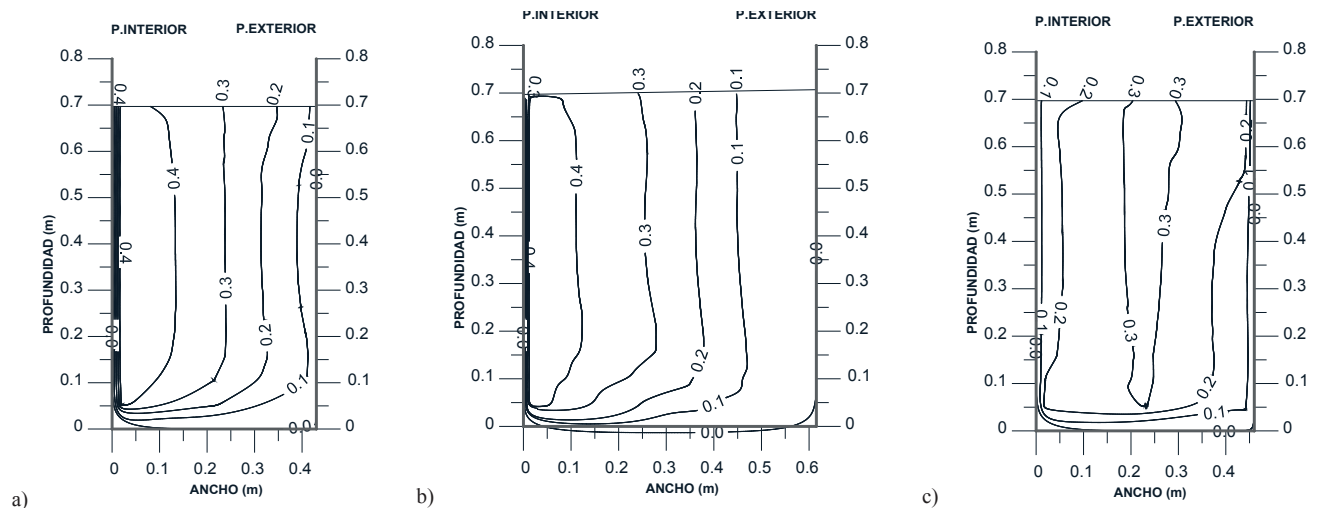

Figura 10 | Líneas de contorno - componente de velocidad longitudinal. *Primera curva cerrada*, secciones: a) 0°, b) 45° y c) 90°.

En la *Segunda curva cerrada*, la influencia del vertedero y la compuerta conduce a la formación de una distribución de velocidad no estructurada, como se puede ver en la Figura 11 a-c. En esta parte del canal, la zona de mayor velocidad tiende hacia la pared exterior.

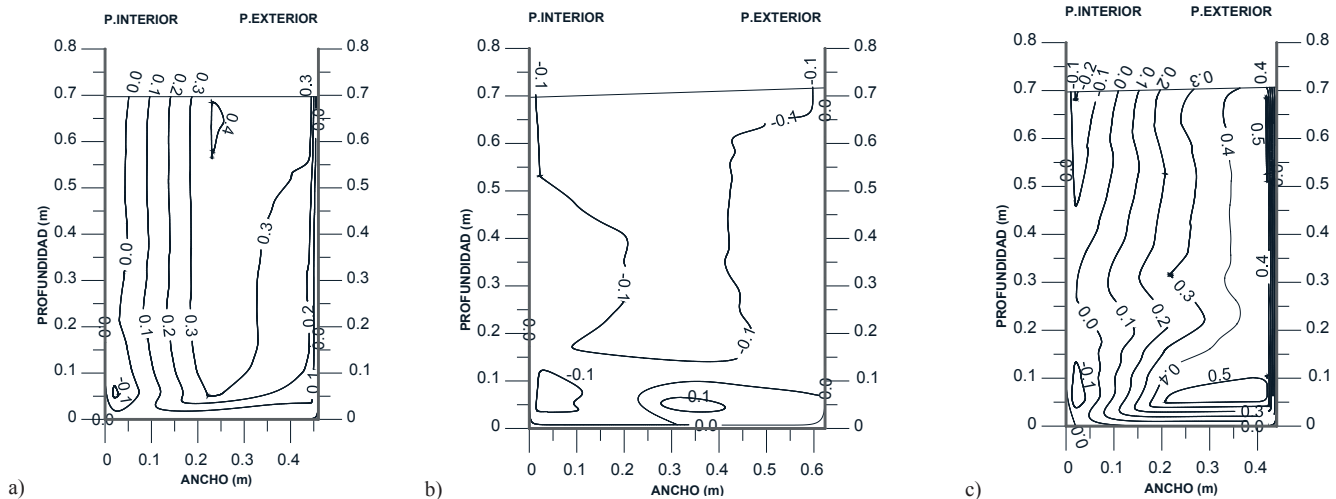

**Figura 11** | Líneas de contorno - componente de velocidad longitudinal. *Segunda curva cerrada*, secciones: a) 0°, b) 45° y c) 90°.

## CONCLUSIONES

En este estudio, se presenta un análisis numérico tridimensional del patrón de flujo en un canal abierto que posee una curva pronunciada. Una particularidad significativa de este estudio es la influencia de un vertedero y una compuerta. Se realizó un análisis de sensibilidad utilizando el enfoque RANS con el objetivo de determinar un tamaño de malla apropiado que proporcione un equilibrio entre la precisión de los resultados y un tiempo de cálculo adecuado. Una vez que el modelo de turbulencia y la configuración del mallado son establecidos, se calibra el parámetro de altura de rugosidad y se analizan las características del campo de flujo.

Los modelos CFD aportan información más allá de las mediciones puntuales realizadas en el laboratorio. Con el aumento espacial de información aportada por este tipo de modelos, se presenta el análisis de líneas de corriente, flujos secundarios y distribución de velocidades. Las principales conclusiones en este estudio son presentadas a continuación.

- Los resultados numéricos tridimensionales presentan un ajuste adecuado al compararlos con los valores experimentales de la variable calado.
- El modelo de turbulencia RNG  $k-\varepsilon$  es el que mejor ajuste presenta al compararlo con el valor experimental de la variable calado.
- En la primera curva cerrada, se forma un flujo secundario principal a lo largo del lecho del canal que se mueve hacia la pared interior cerca de la mitad del ancho del canal y dentro de los 40 cm de altura.
- En la segunda curva cerrada, que está influenciada por un vertedero y una compuerta, se forma un flujo secundario mayor a lo largo del lecho del canal que se mueve hacia la pared exterior, cerca de la mitad del ancho del canal y dentro de los 45 cm de altura. Por el contrario, se forma un flujo secundario menor cerca de la pared interior y dentro de los 20-50 cm de altura del canal a lo largo de la curva.
- En el flujo dentro del canal se aprecia que, en la primera curva cerrada la zona de mayor velocidad ocurre cerca de la pared interior alcanzando valores de hasta 0.4 m/s; mientras que, en la segunda curva cerrada la zona de mayor velocidad se produce cerca de la pared exterior (hacia la parte final de la curva) con valores máximos de 0.5 m/s.

El análisis numérico 3D muestra una zona de bajas velocidades en la pared exterior de la primera curva cerrada que causa una zona de estancamiento. Se sugiere, efectuar modificaciones geométricas al canal y evaluarlas con el objetivo de mejorar la eficiencia del canal en estudio.

## AGRADECIMIENTOS

Este trabajo fue posible gracias al financiamiento de la Secretaria de Educación Superior, Ciencia, Tecnología e Innovación (SENESCYT) del gobierno de la República del Ecuador a través de la beca doctoral del primer autor. Asimismo, los autores desean expresar su gratitud al Instituto de Investigación FLUMEN por facilitar sus instalaciones de laboratorio.

## REFERENCIAS

- Celik, I., Ghia, U., Roache, P., Freitas, C. 2008. Procedure for Estimation and Reporting of Uncertainty Due to Discretization in CFD Applications. *Journal of Fluids Engineering*, 130(7), 1-4. <https://doi.org/10.1115/1.2960953>
- Gholami, A., Akbar Akhtari, A., Minatour, Y., Bonakdari, H., Javadi, A.A. 2014. Experimental and Numerical Study on Velocity Fields and Water Surface Profile in a Strongly-Curved 90° Open Channel Bend. *Engineering Applications of Computational Fluid Mechanics*, 8(3), 447-461. <https://doi.org/10.1080/19942060.2014.11015528>
- Gómez M., Martínez-Gomariz E. 2016. 1D, 2D, and 3D Modeling of a PAC-UPC Laboratory Canal Bend. In: Gourbesville P., Cunge J., Caignaert G. (eds) *Advances in Hydroinformatics*. Springer Water. Springer, Singapore. [https://doi.org/10.1007/978-981-287-615-7\\_29](https://doi.org/10.1007/978-981-287-615-7_29)
- Ippen, A.T., Drinker, P.A. 1962. Boundary Shear Stresses in Curved Trapezoidal Channels. *Journal of the Hydraulics Division*, 88(5), 143-180.
- Kalkwijk, J.P.T., de Vriend, H.J. 1980. Computational of the flow in shallow river bends. *Journal of Hydraulic Research*, 18(4), 327-342. <https://doi.org/10.1080/00221688009499539>
- Lauder, B.E., Spalding, D.B. 1974. The numerical computation of turbulent flows. *Computer Methods in Applied Mechanics and Engineering*, 3(2), 269-289. [https://doi.org/10.1016/0045-7825\(74\)90029-2](https://doi.org/10.1016/0045-7825(74)90029-2)
- MacCormack, R.W., Paullay, A.J. 1972. Computational Efficiency Achieved by Time Splitting of Finite Difference Operators. *American Institute of Aeronautics and Astronautics*, AIAA paper 72-154. <https://doi.org/10.2514/6.1972-154>
- MacDonald, P.W. 1971. The Computation of Transonic Flow Through Two- Dimensional Gas Turbine Cascades. *American Society of Mechanical Engineers*, (Paper 71-GT-89). <https://doi.org/10.1115/71-GT-89>
- Naji Abhari, M., Ghodsian, M., Vaghefi, M., Panahpur, N. 2010. Experimental and numerical simulation of flow in a 90° bend. *Flow Measurement and Instrumentation*, 21(3), 292-298. <https://doi.org/10.1016/j.flowmeasinst.2010.03.002>
- Ramamurthy, A.S., Han, S.S., Biron, P.M. 2013. Three-Dimensional Simulation Parameters for 90° Open Channel Bend Flows. *Journal of Computing in Civil Engineering*, 27(3), 282-291. [https://doi.org/10.1061/\(ASCE\)CP.1943-5487.0000209](https://doi.org/10.1061/(ASCE)CP.1943-5487.0000209)
- Rozovskiĭ, I. 1957. Flow of water in bends of open channels. *Academy of Sciences of the Ukrainian SSR, Kiev, USSR (translated by the Israel Program for Scientific Translations, Jerusalem, 1961)*, Academy of Sciences of the Ukrainian SSR; Israel Program for Scientific Translations]; Kiev; [Washington D.C. available from the Office of Technical Services U.S. Dept. of Commerce].
- Wilcox, D.C. 1994. *Turbulence Modeling for CFD*. (C.D. La Canada and Industries, eds.), DCW Industries, La Canada, California (USA).

Yakhot, V., Orszag, S.A. 1986. Renormalization group analysis of turbulence. I. Basic theory. *Journal of Scientific Computing*, Kluwer Academic/Plenum Publishers, 1(1), 3-51. <https://doi.org/10.1007/BF01061452>
